# Supplementary material for: Gene-environment interaction effects on lung function- a genome-wide association study within the Framingham heart study
Source: PubMed Central journal article supplement (PMC3882096; doi:10.1186/1476-069x-12-101), 2013-12-01

Supplemental Material

**Gene-environment Interactions on Lung Function- A Genome-Wide Association Study in  
the Framingham Heart Study**

Shu-Yi Liao<sup>1</sup>, Xihong Lin<sup>1</sup>, David C. Christiani<sup>1,2</sup>

<sup>1</sup> Harvard School of Public Health, Boston, MA

<sup>2</sup> Harvard Medical School, Boston, MA

FigureS 1. Manhattan plot for interacting SNP with occupational exposure on FEV<sub>1</sub>

# Manhattan Plot

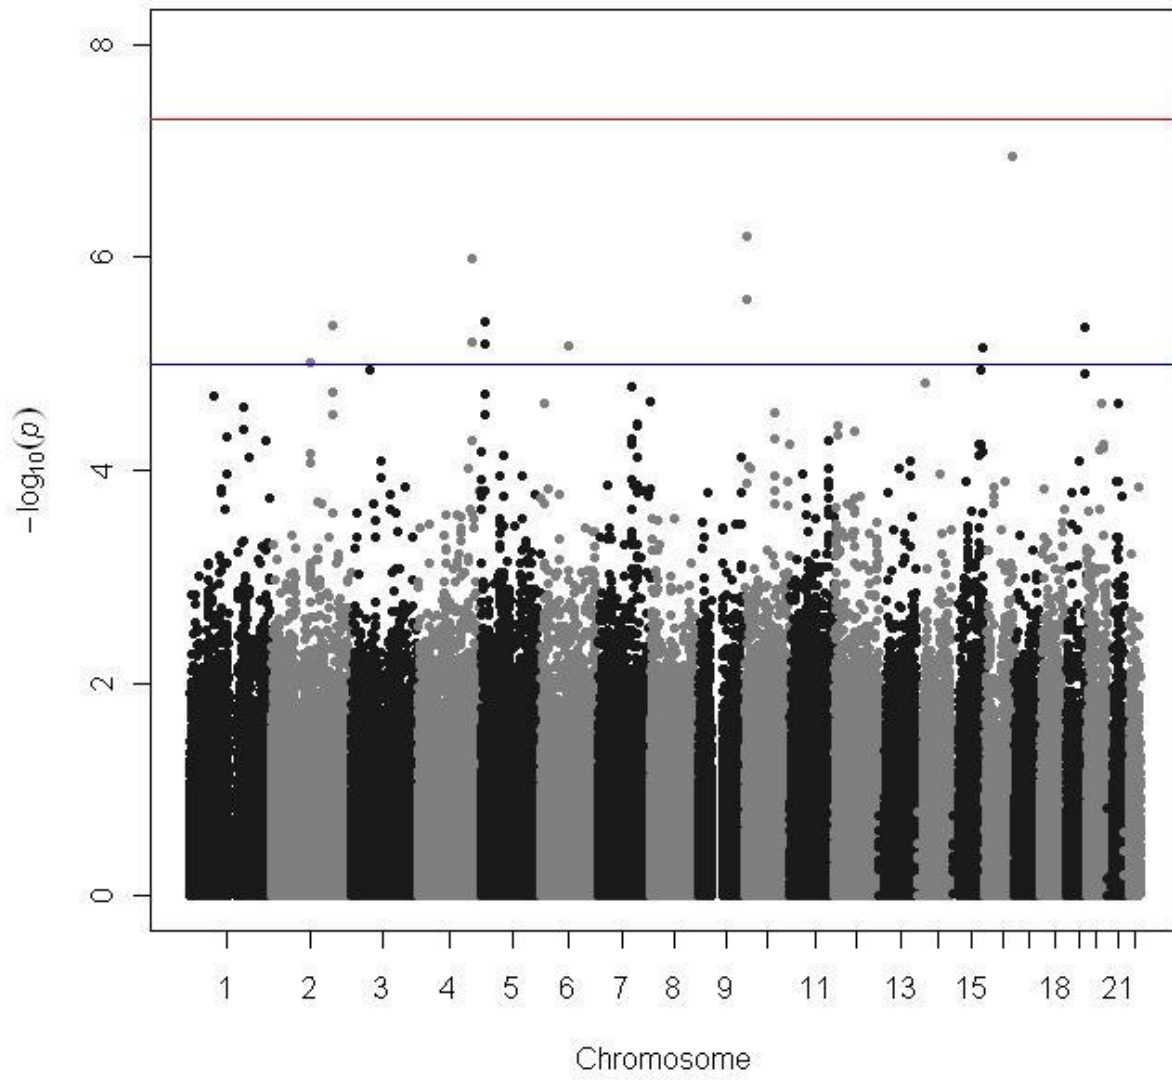

Figure S2. Manhattan plot for interacting SNP with occupational exposure on FEV<sub>1</sub>/FVC

# Manhattan Plot

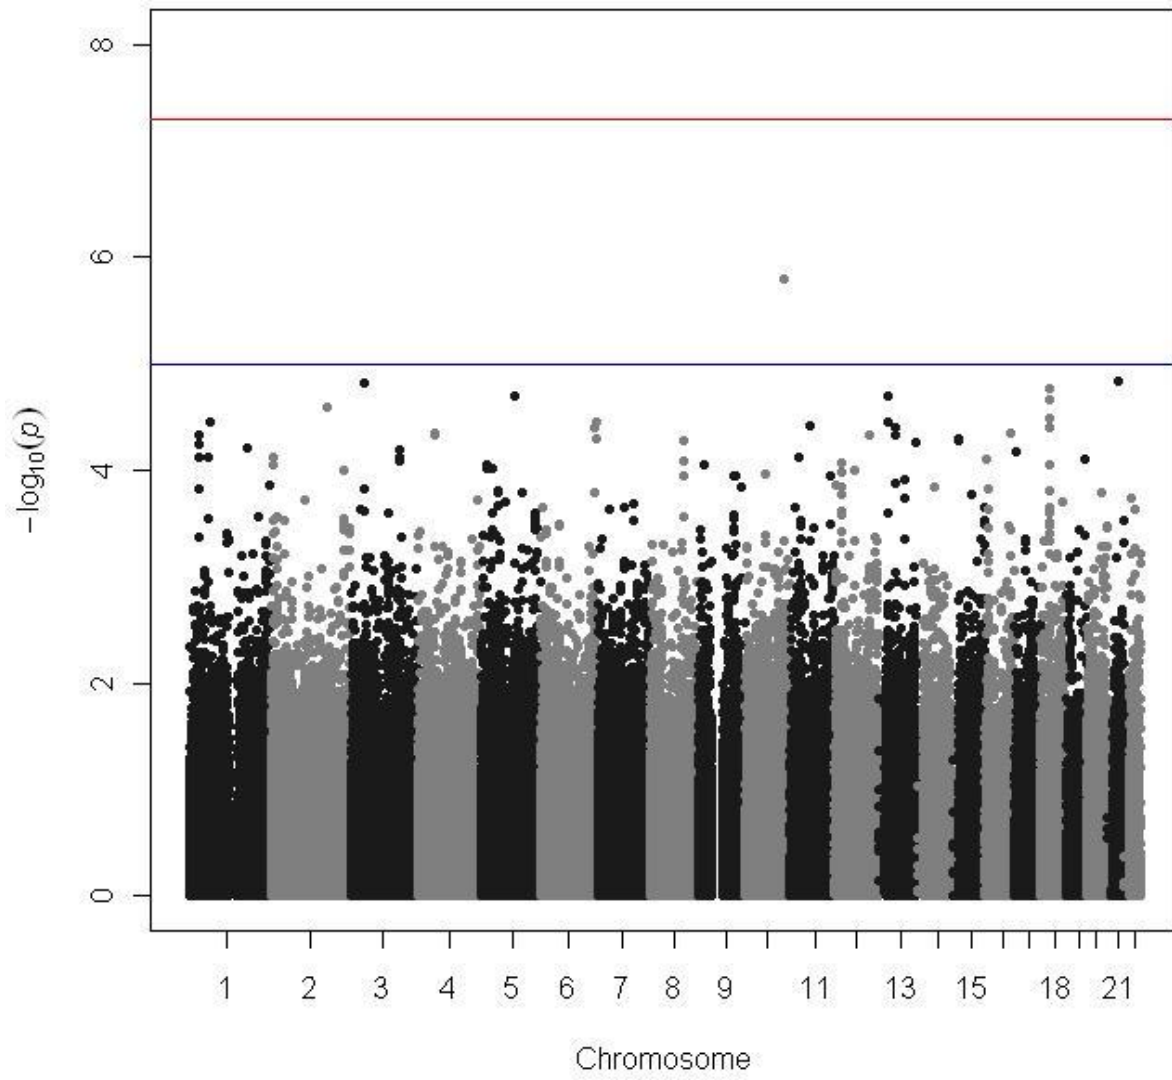

Supplement: 1476-069X-12-101-S1.pdf [file 1476-069X-12-101-S1.pdf]
